# Supplementary material
Source: Springer Nature journal article supplement (https://www.springermedizin.de/resource/supplementary/12936_2011_2024_MOESM5_ESM.pdf/9543350)

IFN- $\gamma$

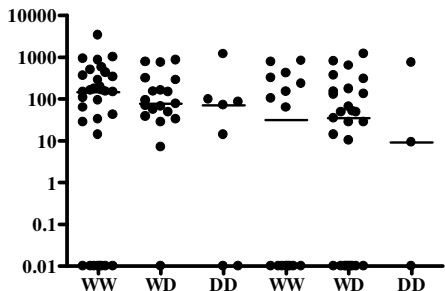

TNF

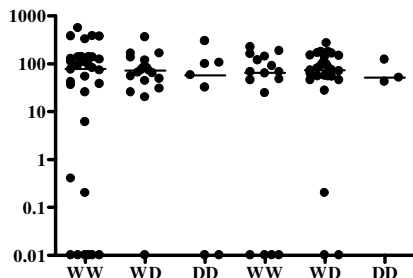

IL-1 $\beta$

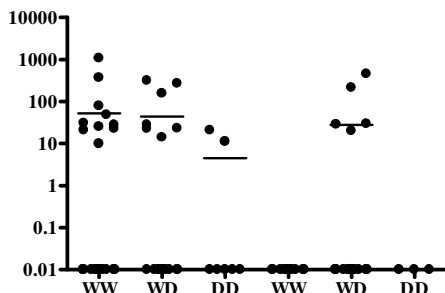

IL-6

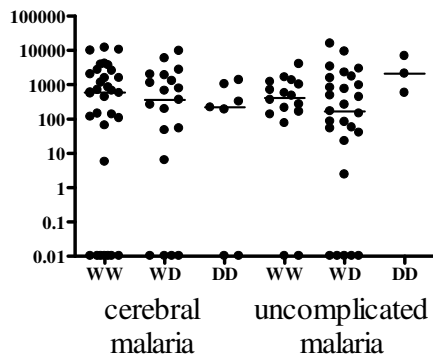

IL-10

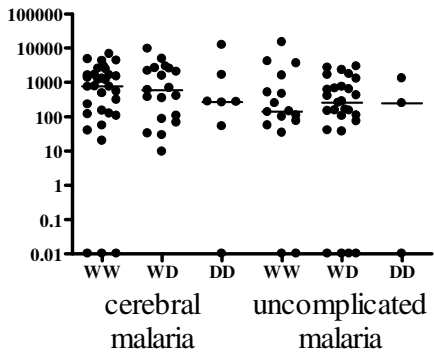

Supplement: MOESM5 [file 9543350]
